# Supplementary material for: Ablation of Iah1, a candidate gene for diet-induced fatty liver, does not affect liver lipid accumulation in mice
Source: PubMed Central journal article supplement (PMC7224509; doi:10.1371/journal.pone.0233087), 2020-05-14

A

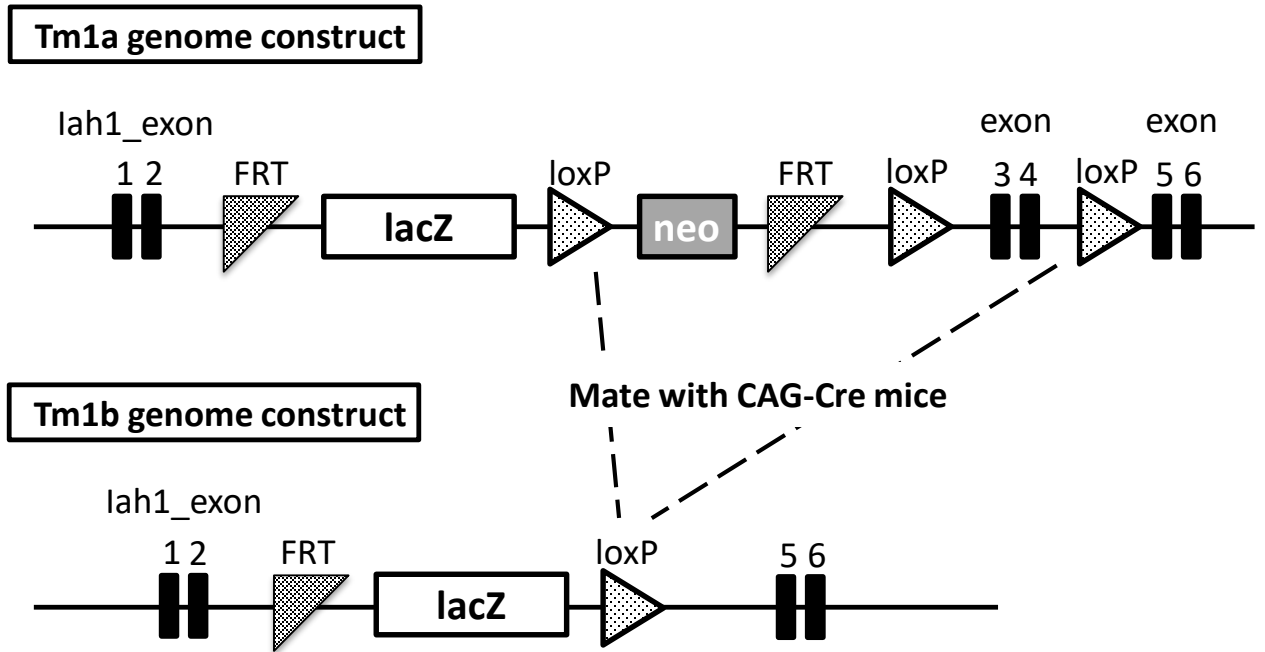

B

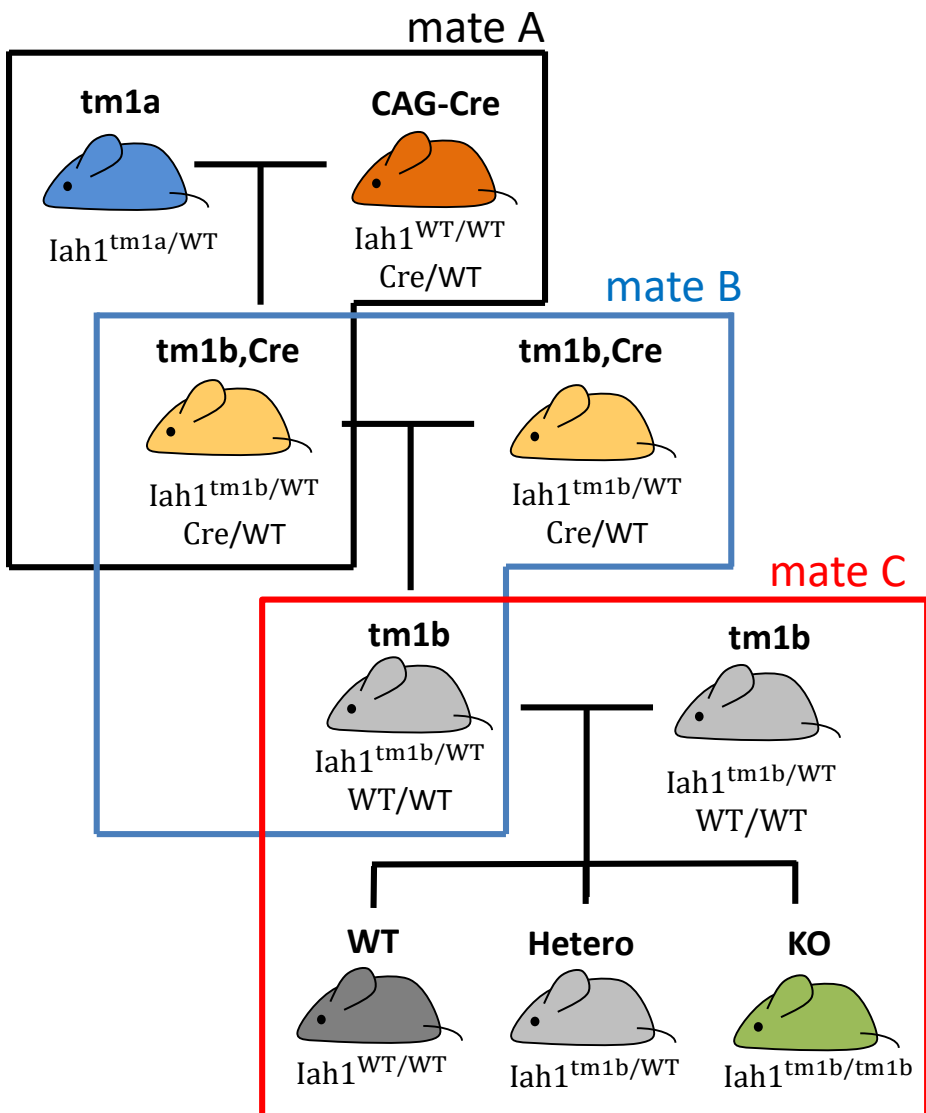

Supplement: pone.0233087.s001.pdf [file pone.0233087.s001.pdf]
