# Supplementary material for: Ablation of Iah1, a candidate gene for diet-induced fatty liver, does not affect liver lipid accumulation in mice
Source: PubMed Central journal article supplement (PMC7224509; doi:10.1371/journal.pone.0233087), 2020-05-14

BAT eWAT Kidney Liver Lung  
M WT KO KO WT KO KO WT KO KO WT KO KO WT KO KO

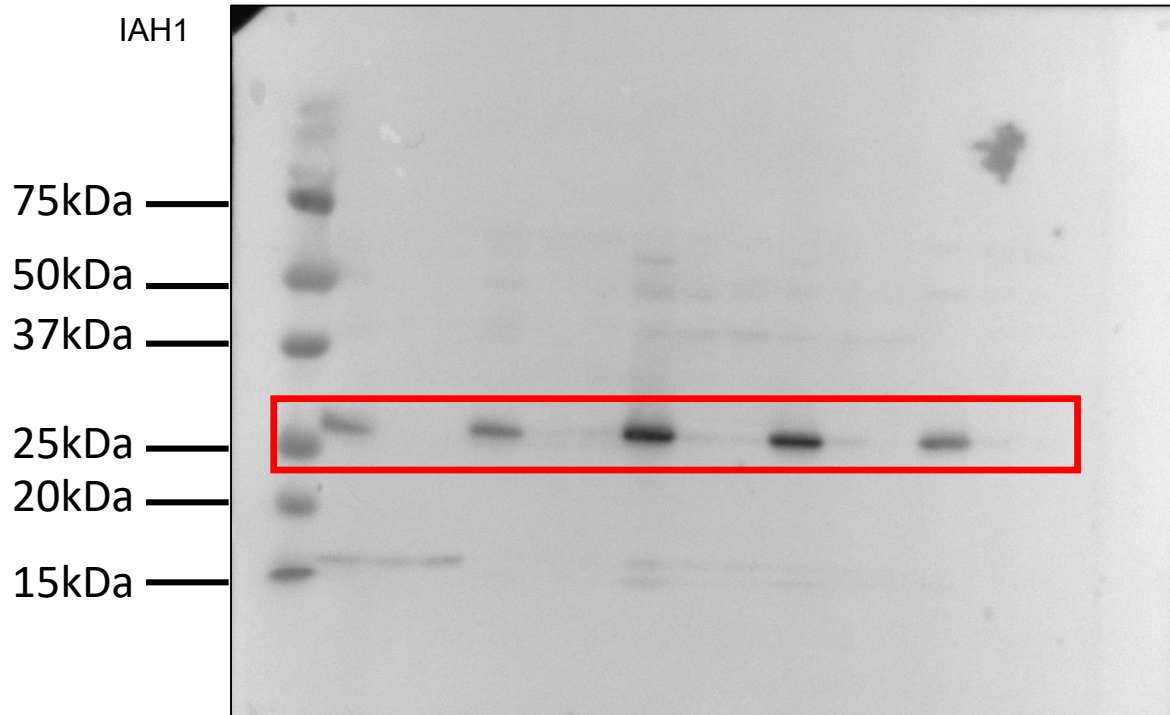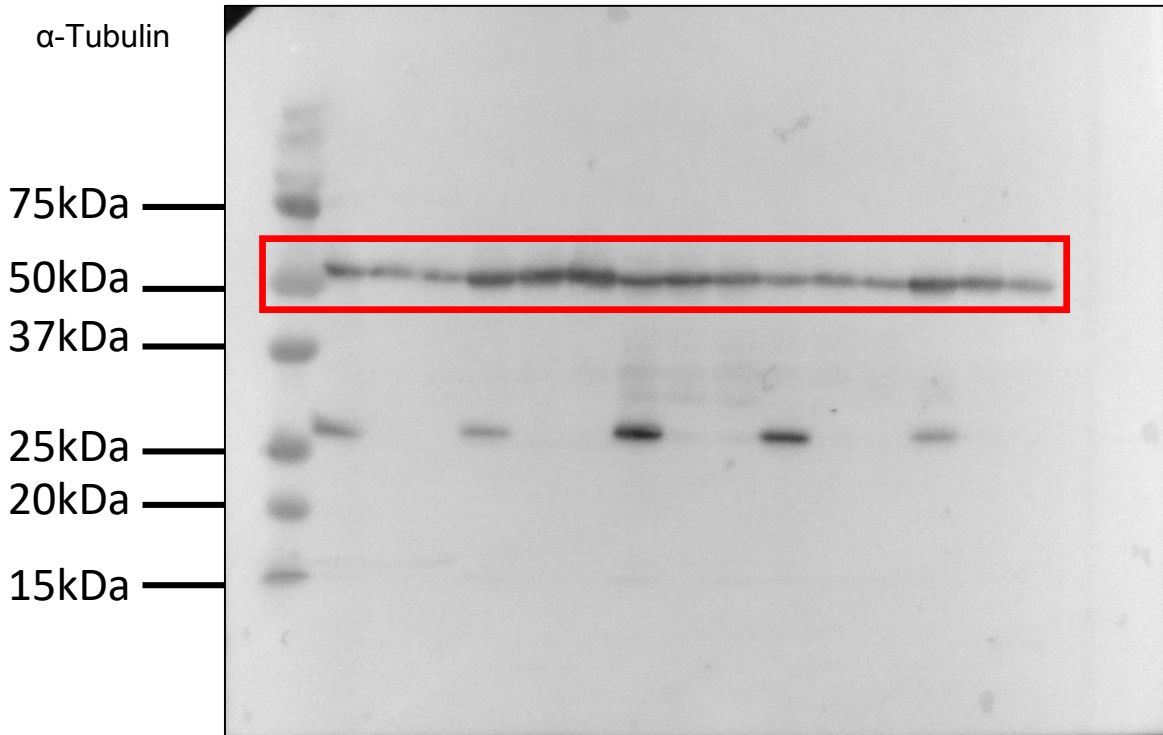

Supplement: pone.0233087.s008.pdf [file pone.0233087.s008.pdf]
