# Supplementary material for: Ablation of Iah1, a candidate gene for diet-induced fatty liver, does not affect liver lipid accumulation in mice
Source: PubMed Central journal article supplement (PMC7224509; doi:10.1371/journal.pone.0233087), 2020-05-14

BAT Intestine Muscle Lung eWAT Liver Kidney  
M KOWTKOWTKOWTKOWTKOWTKOWTKOWT

IAH1

75kDa  
50kDa  
37kDa  
25kDa  
20kDa  
15kDa  
10kDa

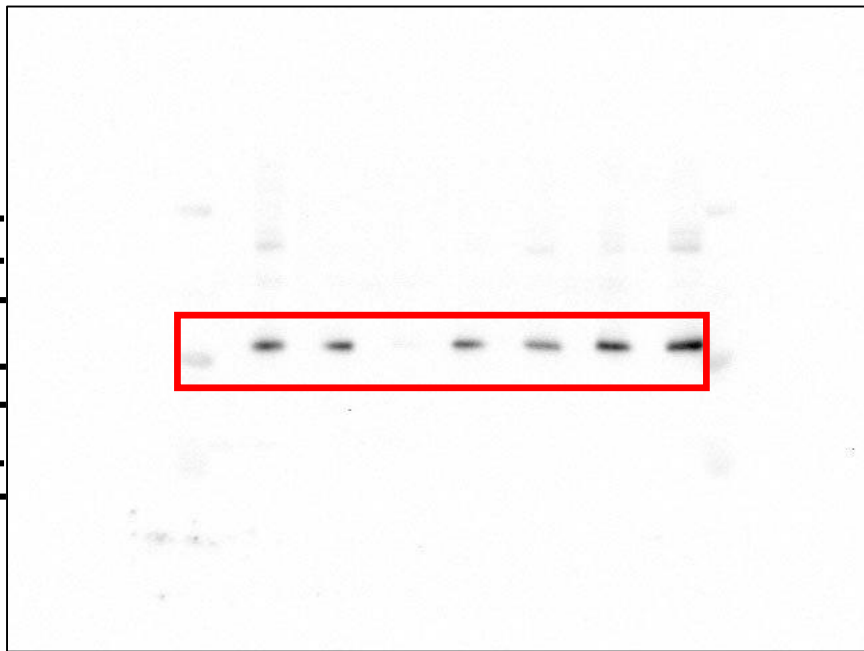

$\alpha$ -Tubulin

75kDa  
50kDa  
37kDa  
25kDa  
20kDa  
15kDa  
10kDa

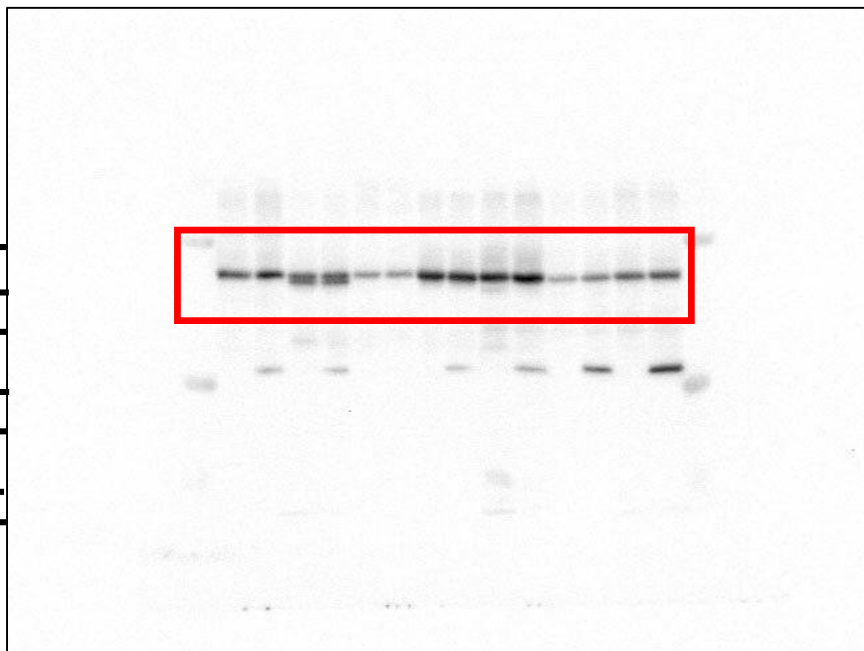

Supplement: pone.0233087.s009.pdf [file pone.0233087.s009.pdf]
